# Supplementary material
Source: PubMed Central journal article supplement (PMC2883852)

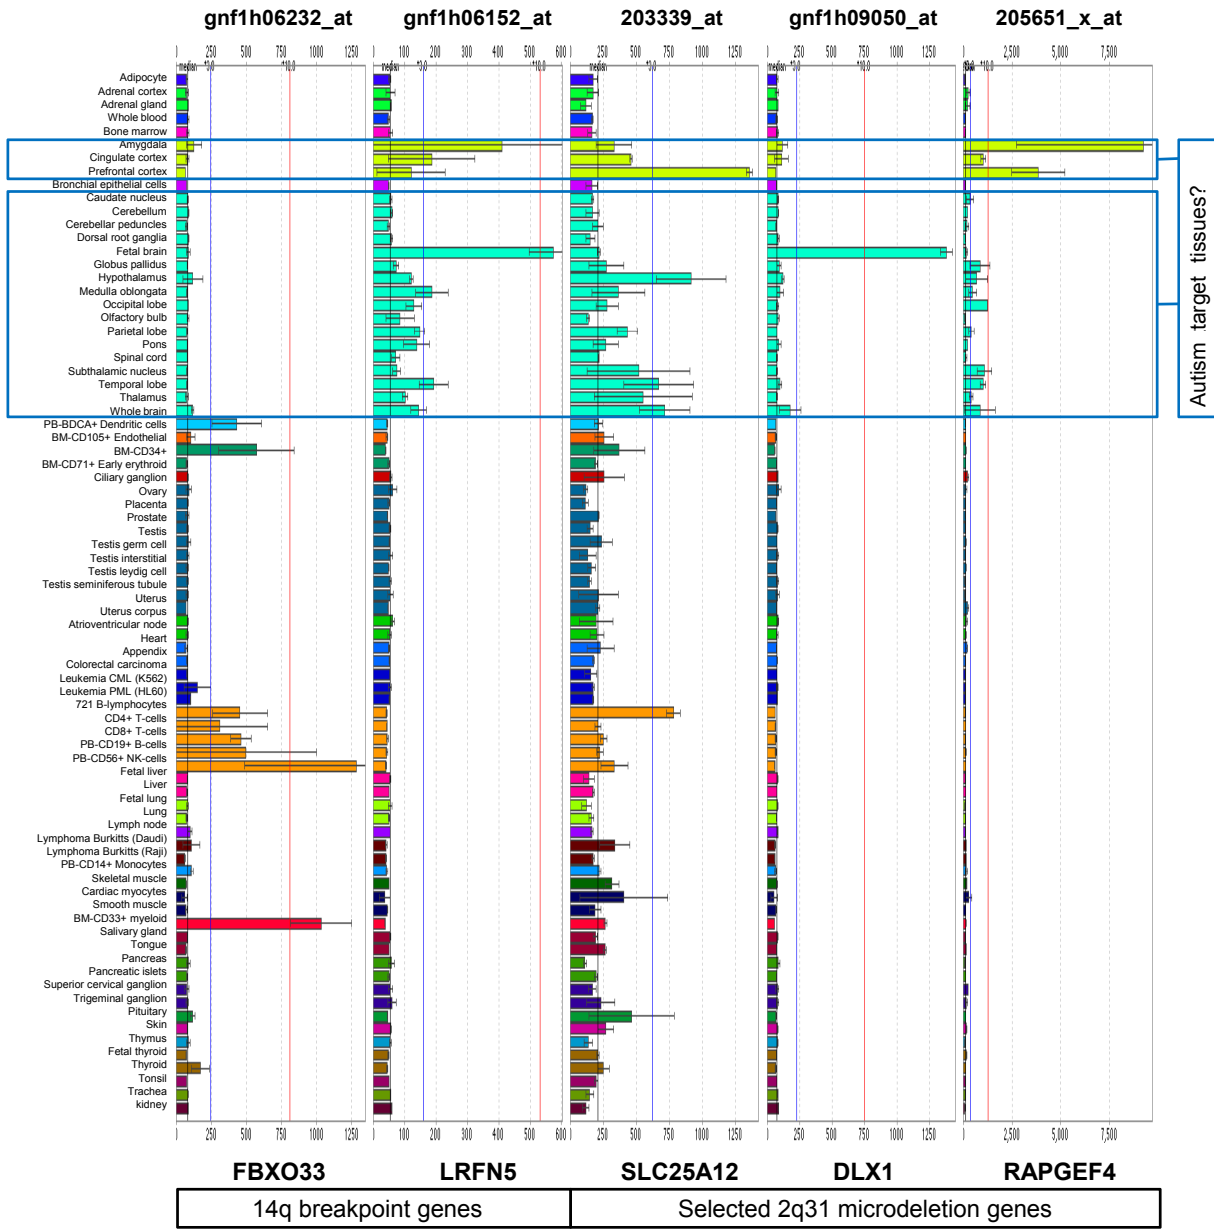

Supplement: msy0001-0046-s05.pdf [file msy0001-0046-s05.pdf]
